# Supplementary material for: A snapshot of antimicrobial resistance in Mexico. Results from 47 centers from 20 states during a six-month period
Source: PubMed Central journal article supplement (PMC6435111; doi:10.1371/journal.pone.0209865), 2019-03-26
Supplement: pone.0209865.s001.pdf [file pone.0209865.s001.pdf]

**S1 Table. Authors and participating centers**

| No Center | Author                        | Hospital or center                                                                                                                                    |
|-----------|-------------------------------|-------------------------------------------------------------------------------------------------------------------------------------------------------|
| 1         | Elvira Garza-González*        | Hospital Universitario Dr. José Eleuterio González, Monterrey, Nuevo León, Mexico.                                                                    |
| 2         | Rayo Morfin-Otero             | Hospital Civil de Guadalajara e instituto de patología infecciosa, Guadalajara, Jalisco, Mexico.                                                      |
|           | Soraya Mendoza-Olazarán       | Hospital Universitario Dr. José Eleuterio González, Monterrey, Nuevo León, Mexico.                                                                    |
|           | Paola Bocanegra-Ibarias       | Hospital Universitario Dr. José Eleuterio González, Monterrey, Nuevo León, Mexico.                                                                    |
|           | Samantha Flores-Treviño       | Hospital Universitario Dr. José Eleuterio González, Monterrey, Nuevo León, Mexico.                                                                    |
|           | Eduardo Rodríguez-Noriega     | Hospital Civil de Guadalajara e instituto de patología infecciosa, Guadalajara, Jalisco, Mexico.                                                      |
| 3         | Alfredo Ponce-de-León         | Instituto Nacional de Ciencias Médicas y Nutrición Salvador Zubirán, CDMX, Mexico.                                                                    |
| 4         | Domingo Sánchez-Francia       | Hospital del Niño y del Adolescente morelense, Cuernavaca, Morelos, Mexico.                                                                           |
| 5         | Rafael Franco-Cendejas        | Instituto Nacional de Rehabilitación Luis Guillermo Ibarra Ibarra, CDMX, Mexico.                                                                      |
| 6         | Sara Arroyo-Escalante         | Hospital General Dr. Manuel Gea González, CDMX, Mexico.                                                                                               |
| 7         | Consuelo Velázquez-Acosta     | Instituto Nacional de Cancerología, CDMX, Mexico.                                                                                                     |
| 8         | Fabián Rojas-Larios           | Hospital Regional Universitario de los Servicios de Salud del Estado de Colima y Facultad de Medicina, Universidad de Colima, Colima, Colima, Mexico. |
| 9         | Luis J. Quintanilla           | Hospital Ángeles Valle Oriente, Monterrey, Nuevo León, Mexico.                                                                                        |
| 10        | Joyarit Y. Maldonado-Anicacio | Hospital General Dr. Raymundo Abarca Alarcón, Chilpancingo, Guerrero, Mexico.                                                                         |
| 11        | Rafael Martínez-Miranda       | Hospital General de Mexicali/Facultad de Medicina Mexicali UABC, Mexicali, Baja California, Mexico.                                                   |
| 12        | Heidy L. Ostos-Cantú          | Swiss Hospital, Monterrey, Nuevo León, Mexico.                                                                                                        |
| 13        | Abraham Gómez-Choel           | Hospital General de Zona No.1, Tapachula, Chiapas, Mexico.                                                                                            |
| 14        | Juan L. Jaime-Sánchez         | Laboratorio Estatal de Salud Pública de Michoacán, Morelia, Michoacán, Mexico.                                                                        |
| 15        | Laura K. Avilés-Benítez       | Hospital Infantil de Morelia, Morelia, Michoacán, Mexico.                                                                                             |
| 16        | José M. Feliciano-Guzmán      | Hospital de especialidades pediátricas de Chiapas, Tuxtla Gutiérrez, Chiapas, Mexico.                                                                 |
| 17        | Cynthia D. Peña-López         | Hospital Clínica Nova, Monterrey, Nuevo León, Mexico.                                                                                                 |
| 18        | Carlos A. Couoh-May           | Hospital general de Mérida Yucatán “Dr. Agustín O ‘Horan’”, Mérida, Yucatán, Mexico.                                                                  |
| 19        | Norma Alavez-Ramírez          | Hospital Regional de alta especialidad Bicentenario de la independencia, Tultitlán de Mariano Escobedo, Estado de México, Mexico.                     |
| 20        | Elda G. Vázquez -Narváez      | Hospital Ángeles de Morelia, Morelia, Michoacán, Mexico.                                                                                              |
| 21        | Joaquín Rincón-Zuno           | Hospital para el Niño Toluca IMIEM, Toluca, Estado de México, Mexico.                                                                                 |
| 22        | Raúl Rivera-Garay             | Hospital Regional de alta Especialidad del Bajío, León, Guanajuato, Mexico.                                                                           |
| 23        | Aurelio Galindo-Espinoza      | Hospital General presidente Lázaro Cárdenas del Rio, Chihuahua, Chihuahua, Mexico.                                                                    |
| 24        | Andrés Martínez-Ramírez       | Sanatorio La luz, Morelia, Michoacán, Mexico.                                                                                                         |
| 25        | Javier P. Mora                | Hospital de Alta Especialidad de Veracruz, Veracruz, Veracruz, Mexico.                                                                                |
| 26        | Reyna E. Corte- Rojas         | Hospital para el niño poblano, Puebla, Puebla, Mexico.                                                                                                |
| 27        | Ismelda López-Ovilla          | Hospital Dr. Jesús Gilberto Gómez Maza, Tuxtla Gutiérrez, Chiapas, Mexico.                                                                            |
| 28        | Víctor A. Monroy-Colin        | Centenario Hospital Miguel Hidalgo, Aguascalientes, Aguascalientes, Mexico.                                                                           |
| 29        | Juan M. Barajas-Magallón      | Laboratorio Dipromi, Morelia, Michoacán, Mexico.                                                                                                      |
| 30        | Cecilia T. Morales-De-la-Peña | Hospital General con Especialidades Juan María de Salvatierra, La Paz, Baja California Sur, Mexico.                                                   |

|        |                            |                                                                                                                                                                          |
|--------|----------------------------|--------------------------------------------------------------------------------------------------------------------------------------------------------------------------|
| 31     | Efrén Aguirre-Burciaga     | Hospital Regional Delicias, Delicias, Chihuahua, Mexico.                                                                                                                 |
| 32     | Mabel Coronado-Ramírez     | Hospital de la Mujer de ciudad Juárez, Ciudad Juárez, Chihuahua, Mexico.                                                                                                 |
| 33     | Alina A. Rosales-García    | Hospital de Especialidades Pediátrico de León, León, Guanajuato, Mexico.                                                                                                 |
| 34     | María de J. Ayala-Tarín    | Hospital Infantil de especialidades de Juárez, Ciudad Juárez, Chihuahua, Mexico.                                                                                         |
| 35     | Silvia Sida-Rodríguez      | Laboratorio Jurisdiccional de Ciudad Juárez, Ciudad Juárez, Chihuahua, Mexico.                                                                                           |
| 36     | Bertha A. Pérez-Vega       | Hospital Ángeles de Chihuahua, Chihuahua, Chihuahua, Mexico.                                                                                                             |
| 37     | América Navarro-Rodríguez  | Galenia Hospital, Cancún, Quintana Roo, Mexico.                                                                                                                          |
| 38     | Gloria E. Juárez-Velázquez | Hospital Regional de alta especialidad Cd. Victoria, Ciudad Victoria, Tamaulipas, Mexico.                                                                                |
| 39     | Carlos Miguel Cetina-Umaña | Hospital Materno Infantil Morelos de Chetumal, Chetumal, Quintana Roo, Mexico.                                                                                           |
| 40     | Juan P. Mena-Ramírez       | Hospital General de Zona Tepatitlán de Morelos, Tepatitlán de Morelos, Jalisco, Mexico.                                                                                  |
| 41, 42 | Jorge Canizales-Oviedo     | Centro Universitario de Salud, UANL Pueblo Nuevo, Monterrey, Nuevo León, Mexico.<br>Centro Universitario de Salud, UANL Vicente Guerrero, Monterrey, Nuevo León, Mexico. |
| 43     | Martha Irene Moreno-Méndez | Laboratorios del Centro, Zamora, Michoacán, Mexico.                                                                                                                      |
| 44     | Daniel Romero-Romero       | Laboratorio de Análisis Bioquímico Clínicos "Louis Pasteur", Toluca, Estado de México, Mexico.                                                                           |
| 45     | Alejandra Arévalo-Mejía    | Hospital General regional. Toluca, Estado de México, Mexico.                                                                                                             |
| 46     | Dulce Isabel Cobos-Canul   | Hospital General de Chetumal, Chetumal, Quintana Roo, Mexico.                                                                                                            |
| 47     | Gilberto Aguilar-Orozco    | Hospital Arada de la Parra, León, Guanajuato, Mexico.                                                                                                                    |
| 48     | Jesús Silva-Sánchez        | Instituto Nacional de Salud Pública, Cuernavaca, Morelos, Mexico.                                                                                                        |
| 1      | Adrián Camacho-Ortiz       | Hospital Universitario Dr. José Eleuterio González, Monterrey, Nuevo León, Mexico.                                                                                       |
